# Supplementary material
Source: PubMed Central journal article supplement (PMC3386879)
Supplement: 1201886109_pnas.201201886SI.pdf [file 1201886109_pnas.201201886SI.pdf]

# Supporting Information

Bass and Chagnaud 10.1073/pnas.1201886109

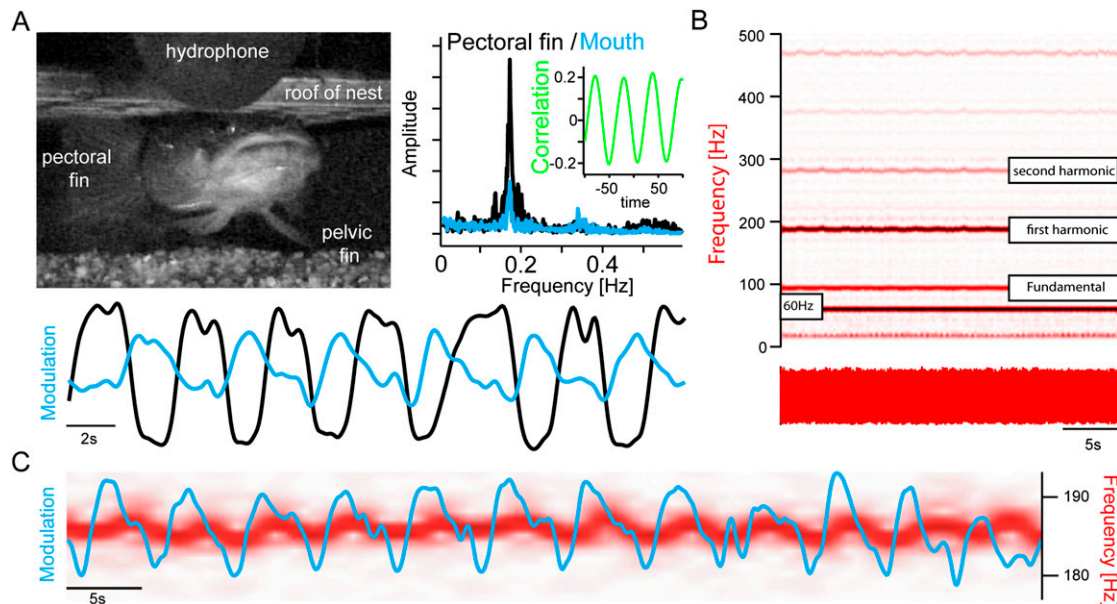

**Fig. S1.** (A) *Upper Left*: Photograph at night of a type I male midshipman in artificial nest (elevated ceramic tile) in aquarium taken from a video sequence in which the fish constantly produces his advertisement “hum” call (courtesy of A. Bass and M. Marchaterre, Cornell University). *Lower*: Superimposed waveforms of modulation rhythm of pectoral fin (black) and mouth (blue) movement during advertisement humming (analyzed by using video tracking). *Upper Right*: Corresponding fast Fourier transforms of both waveform signals show matched modulation frequencies for fin and mouth movement; correlation (*Inset*) shows high temporal matching of both rhythms. (B) Sonogram (*Upper*) and waveform (*Lower*) of hydrophone recording of midshipman advertisement call (i.e., hum) recorded simultaneously with the video in A. Indicated is the 60-Hz band from the power line, the fundamental frequency, and the first two upper harmonics. (C) Overlay of waveform of mouth waveform (blue, approximate breathing rhythm) and modulation hum frequency (red, first harmonic) of simultaneous recorded midshipman hum in B. Both modulations are in phase despite call generation in fishes not requiring airflow over a membrane like most terrestrial vertebrates (see text).

**Table S1. Summary of intrinsic and network properties exhibited by caudal hindbrain rh8 premotor populations coding for specific behavioral attributes**

| rh8 system                | Intrinsic/network property |                         |                   |                    |                       |
|---------------------------|----------------------------|-------------------------|-------------------|--------------------|-----------------------|
|                           | Inhibitory input           | Gap junctional coupling | Pacemaking rhythm | Concomitant firing | Dense input to target |
| Inferior olive            | x                          | x                       | x                 | x                  | x                     |
| Vocal pacemaker           | x                          | x                       | x                 | x                  | x                     |
| Pectoral                  | NA                         | x                       | NA                | x                  | x                     |
| Oculomotor (eye position) | x                          | NA                      | —                 | x                  | x                     |
| Vocal prepacemaker        | x                          | x                       | —                 | x                  | x                     |
| Electromotor pacemaker    | NA                         | x                       | x                 | x                  | x                     |

NA, not available; rh8, rhombomere 8.
